# Supplementary material for: Microbial Diversity and Putative Opportunistic Pathogens in Dishwasher Biofilm Communities
Source: PubMed Central journal article supplement (PMC5812945; doi:10.1128/aem.02755-17), 2018-02-14
Supplement: AEM.02755-17_zam005188350s1.pdf [file AEM.02755-17_zam005188350s1.pdf]

1 **Supplementary information**

2 **Supplementary Figure S1: Microbial composition in individual samples at the phylum**  
3 **level. (A) Fungal and (B) bacterial abundance (%) across DW samples. The low abundant**  
4 **phyla Acidobacteria, Chloroflexi, Cyanobacteria, Spirochaetes, Synergistetes,**  
5 **Verrucomicrobia and other unclassified/unassigned reads are combined in the miniscule**  
6 **'others'. Gap in the dataset refer to samples where sequence data could not be generated.**

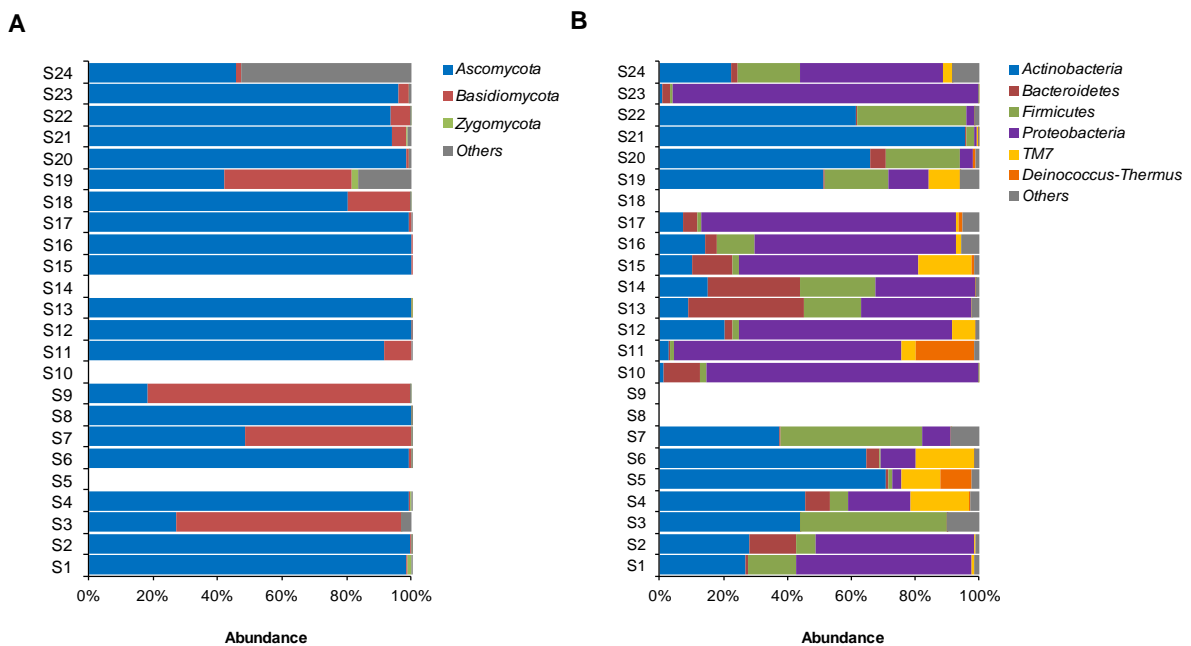



13 **Supplementary Table S1:** Summary table of 16S rRNA gene and ITS gene based amplicon  
 14 profiles obtained. ‘No reads’ indicates samples where sequences reads could not be generated.  
 15 SRR represents the SRA accession numbers obtained after deposition of raw reads to NCBI  
 16 database.

| <b>Bacterial Richness</b> |             |               |                | <b>Fungal Richness</b> |             |               |                |
|---------------------------|-------------|---------------|----------------|------------------------|-------------|---------------|----------------|
| <b>Samples</b>            | <b>OTUs</b> | <b>Counts</b> | <b>SRR</b>     | <b>Samples</b>         | <b>OTUs</b> | <b>Counts</b> | <b>SRR</b>     |
| <b>S1</b>                 | 97          | 12056         | <i>3335213</i> | <b>S1</b>              | 26          | 4536          | <i>3354512</i> |
| <b>S2</b>                 | 104         | 14880         | <i>3279031</i> | <b>S2</b>              | 30          | 47413         | <i>3354513</i> |
| <b>S3</b>                 | 35          | 13294         | <i>3335242</i> | <b>S3</b>              | 64          | 52407         | <i>3354514</i> |
| <b>S4</b>                 | 105         | 11086         | <i>3343755</i> | <b>S4</b>              | 32          | 53664         | <i>3354515</i> |
| <b>S5</b>                 | 56          | 4812          | <i>3343756</i> | <b>S5</b>              | No reads    | No reads      | No reads       |
| <b>S6</b>                 | 104         | 8872          | <i>3343757</i> | <b>S6</b>              | 43          | 9514          | <i>3354535</i> |
| <b>S7</b>                 | 112         | 5790          | <i>3343758</i> | <b>S7</b>              | 26          | 28574         | <i>3354573</i> |
| <b>S8</b>                 | No reads    | No reads      | No reads       | <b>S8</b>              | 22          | 37174         | <i>3354574</i> |
| <b>S9</b>                 | No reads    | No reads      | No reads       | <b>S9</b>              | 60          | 24041         | <i>3354575</i> |
| <b>S10</b>                | 115         | 17912         | <i>3343759</i> | <b>S10</b>             | No reads    | No reads      | No reads       |
| <b>S11</b>                | 55          | 1511          | <i>3343760</i> | <b>S11</b>             | 33          | 14060         | <i>3354576</i> |
| <b>S12</b>                | 60          | 961           | <i>3343761</i> | <b>S12</b>             | 26          | 19847         | <i>3354577</i> |
| <b>S13</b>                | 104         | 14995         | <i>3343763</i> | <b>S13</b>             | 28          | 9602          | <i>3354578</i> |
| <b>S14</b>                | 96          | 6661          | <i>3343796</i> | <b>S14</b>             | No reads    | No reads      | No reads       |
| <b>S15</b>                | 107         | 9683          | <i>3343797</i> | <b>S15</b>             | 15          | 10340         | <i>3354579</i> |
| <b>S16</b>                | 50          | 127           | <i>3343798</i> | <b>S16</b>             | 20          | 3520          | <i>3354580</i> |
| <b>S17</b>                | 107         | 3580          | <i>3343799</i> | <b>S17</b>             | 18          | 3601          | <i>3354581</i> |
| <b>S18</b>                | No reads    | No reads      | No reads       | <b>S18</b>             | 30          | 2162          | <i>3354582</i> |
| <b>S19</b>                | 95          | 24429         | <i>3343800</i> | <b>S19</b>             | 104         | 4372          | <i>3354583</i> |
| <b>S20</b>                | 29          | 100           | <i>3343802</i> | <b>S20</b>             | 25          | 660           | <i>3354584</i> |
| <b>S21</b>                | 71          | 8529          | <i>3343803</i> | <b>S21</b>             | 45          | 891           | <i>3354585</i> |
| <b>S22</b>                | 110         | 26115         | <i>3343805</i> | <b>S22</b>             | 27          | 472           | <i>3354587</i> |
| <b>S23</b>                | 92          | 15960         | <i>3343810</i> | <b>S23</b>             | 30          | 436           | <i>3354588</i> |
| <b>S24</b>                | 150         | 13036         | <i>3335236</i> | <b>S24</b>             | 40          | 49511         | <i>3354600</i> |

17 **Supplementary Table S2:** Dishwasher alpha diversity summary post rarefaction of sequence  
 18 counts. ‘NA’ indicates samples in which sequences reads were not generated.

| Samples    | Bacterial Diversity |           |        | Samples    | Fungal Diversity   |           |        |
|------------|---------------------|-----------|--------|------------|--------------------|-----------|--------|
|            | Richness<br>Taxa_S  | Shannon_H | Chao-1 |            | Richness<br>Taxa_S | Shannon_H | Chao-1 |
| <b>S1</b>  | 69                  | 2.7       | 78     | <b>S1</b>  | 10                 | 0.7633    | 11     |
| <b>S2</b>  | 75                  | 2.9       | 82     | <b>S2</b>  | 5                  | 0.32      | 5      |
| <b>S3</b>  | 18                  | 1.2       | 19     | <b>S3</b>  | 16                 | 1.658     | 16     |
| <b>S4</b>  | 75                  | 2.2       | 103    | <b>S4</b>  | 10                 | 0.9061    | 12     |
| <b>S5</b>  | 48                  | 1.7       | 54     | <b>S5</b>  | NA                 | NA        | NA     |
| <b>S6</b>  | 72                  | 2.0       | 83     | <b>S6</b>  | 13                 | 1.441     | 16     |
| <b>S7</b>  | 87                  | 2.7       | 108    | <b>S7</b>  | 3                  | 0.03494   | 4      |
| <b>S8</b>  | NA                  | NA        | NA     | <b>S8</b>  | 19                 | 1.601     | 24     |
| <b>S9</b>  | NA                  | NA        | NA     | <b>S9</b>  | NA                 | NA        | NA     |
| <b>S10</b> | 78                  | 2.4       | 92     | <b>S10</b> | 15                 | 1.655     | 17     |
| <b>S11</b> | -                   | -         | -      | <b>S11</b> | 7                  | 0.3897    | 9      |
| <b>S12</b> | -                   | -         | -      | <b>S12</b> | 8                  | 0.8721    | 8      |
| <b>S13</b> | 68                  | 2.5       | 79     | <b>S13</b> | NA                 | NA        | NA     |
| <b>S14</b> | 73                  | 2.8       | 103    | <b>S14</b> | 4                  | 0.697     | 4      |
| <b>S15</b> | 84                  | 3.0       | 105    | <b>S15</b> | 10                 | 1.039     | 25     |
| <b>S16</b> | -                   | -         | -      | <b>S16</b> | 7                  | 0.261     | 10     |
| <b>S17</b> | -                   | -         | -      | <b>S17</b> | 12                 | 1.632     | 14     |
| <b>S18</b> | NA                  | NA        | NA     | <b>S18</b> | 42                 | 2.714     | 46     |
| <b>S19</b> | 51                  | 2.2       | 62     | <b>S19</b> | 14                 | 0.8477    | 16     |
| <b>S20</b> | -                   | -         | -      | <b>S20</b> | 26                 | 1.481     | 32     |
| <b>S21</b> | 50                  | 2.0       | 55     | <b>S21</b> | 21                 | 2.483     | 23     |
| <b>S22</b> | 59                  | 2.2       | 74     | <b>S22</b> | 26                 | 1.276     | 30     |
| <b>S23</b> | 57                  | 1.3       | 83     | <b>S23</b> | 22                 | 1.669     | 31     |
| <b>S24</b> | 110                 | 3.6       | 133    | <b>S24</b> | 10                 | 0.7633    | 11     |

19 **Supplementary Table S3:** Summary of p-values from pairwise comparisons on bacterial  
 20 alpha diversity indices using Wilcoxon-Mann-Whitney.

| <i>Chao-1</i>    | Year | 0-4  | 5-7  | Freq | 1-3  | 7    | WH | MS   | SH   | MH   |
|------------------|------|------|------|------|------|------|----|------|------|------|
|                  | 0-4  | -    | 0.43 | 1-3  | -    | 0.56 | MS | -    | 0.55 | 0.31 |
|                  | 5-7  | 0.43 | -    | 7    | 0.56 | -    | SH | 0.55 | -    | 0.62 |
|                  | 8    | 0.47 | 0.21 | 14   | 0.99 | 0.70 | MH | 0.31 | 0.62 | -    |
|                  |      |      |      |      |      |      | H  | 0.27 | 0.49 | 0.72 |
| <i>Shannon_H</i> | Year | 0-4  | 5-7  | Freq | 1-3  | 7    | WH | MS   | SH   | MH   |
|                  | 0-4  | -    | 0.52 | 1-3  | -    | 0.16 | MS | -    | 0.35 | 0.07 |
|                  | 5-7  | 0.52 | -    | 7    | 0.16 | -    | SH | 0.35 | -    | 0.28 |
|                  | 8    | 0.37 | 0.22 | 14   | 0.63 | 0.16 | MH | 0.07 | 0.28 | -    |
|                  |      |      |      |      |      |      | H  | 0.28 | 0.71 | 0.66 |
| <i>Richness</i>  | Year | 0-4  | 5-7  | Freq | 1-3  | 7    | WH | MS   | SH   | MH   |
|                  | 0-4  | -    | 0.41 | 1-3  | -    | 0.28 | MS | -    | 0.42 | 0.24 |
|                  | 5-7  | 0.41 | -    | 7    | 0.28 | -    | SH | 0.42 | -    | 0.67 |
|                  | 8    | 0.30 | 0.13 | 14   | 0.99 | 0.46 | MH | 0.24 | 0.67 | -    |
|                  |      |      |      |      |      |      | H  | 0.20 | 0.46 | 0.65 |

21 **Supplementary Table S4:** Summary of p-values from pairwise comparisons on fungal alpha  
 22 diversity indices using Wilcoxon-Mann-Whitney (\*  $p \leq 0.05$ )

| <i>Chao-1</i>    | Year | 0-4   | 5-7   | Freq | 0-6  | WH | MS    | SH      | MH     |
|------------------|------|-------|-------|------|------|----|-------|---------|--------|
|                  | 0-4  | -     | 0.72  | 7-14 | 0.20 | MS | -     | 0.19    | 0.27   |
|                  | 5-7  | 0.72  | -     |      |      | SH | 0.19  | -       | 0.71   |
|                  | 8    | 0.91  | 0.82  |      |      | MH | 0.27  | 0.71    | -      |
|                  |      |       |       |      |      | H  | 0.19  | 0.01*   | 0.02*  |
| <i>Shannon_H</i> | Year | 0-4   | 5-7   | Freq | 0-6  | WH | MS    | SH      | MH     |
|                  | 0-4  | -     | 0.04* | 7-14 | 0.31 | MS | -     | 0.28    | 0.64   |
|                  | 5-7  | 0.04* | -     |      |      | SH | 0.28  | -       | 0.38   |
|                  | 8    | 0.84  |       |      |      | MH | 0.64  | 0.38    | -      |
|                  |      |       |       |      |      | H  | 0.02* | 0.0009* | 0.003* |
| <i>Richness</i>  | Year | 0-4   | 5-7   | Freq | 0-6  | WH | MS    | SH      | MH     |
|                  | 0-4  | -     | 0.56  | 7-14 | 0.4  | MS | -     | 0.33    | 0.25   |
|                  | 5-7  | 0.56  | -     |      |      | SH | 0.33  | -       | 0.85   |
|                  | 8    | 0.98  | 0.60  |      |      | MH | 0.25  | 0.85    | -      |
|                  |      |       |       |      |      | H  | 0.05* | 0.01*   | 0.01*  |

23 **Supplementary Table S5:** Summary from redundancy based ANOVA analysis done using  
 24 each of the factors (999 permutations). The composition of the bacterial community was  
 25 significantly affected by the factors ‘years of use’ and ‘frequency’ of DWs. The composition  
 26 of fungal community was significantly affected by years of use, frequency of use and tap  
 27 water hardness. df: degrees of freedom; F: ratio of the between groups variance and within  
 28 groups variance; p: p-values. Star indicates the level of significance of each factor: ‘\*’ p <  
 29 0.05.

| Source                | Factors                                                               | df | Variance (%) | F    | p       |
|-----------------------|-----------------------------------------------------------------------|----|--------------|------|---------|
| Bacteria<br>Diversity | Years (0-4y, 5-7y and 8y)                                             | 2  | 23.44        | 1.34 | 0.047*  |
|                       | Temperature ( $\geq 65^{\circ}\text{C}$ , $\leq 60^{\circ}\text{C}$ ) | 1  | 9.63         | 1.11 | 0.299   |
|                       | Frequency of use ( 1-3, 7 and 14)                                     | 2  | 27.21        | 1.55 | 0.022*  |
|                       | Water Hardness ( H,MH,SH and MS)                                      | 3  | 24.00        | 0.91 | 0.660   |
| Fungi<br>Diversity    | Years (0-4y, 5-7y and 8y)                                             | 2  | 9.47         | 1.32 | 0.043 * |
|                       | Temperature ( $\geq 65^{\circ}\text{C}$ , $\leq 60^{\circ}\text{C}$ ) | 1  | 4.04         | 1.12 | 0.280   |
|                       | Frequency of use ( 0-7 and 14)                                        | 1  | 5.78         | 1.61 | 0.034 * |
|                       | Water Hardness ( H,MH,SH and MS)                                      | 3  | 18.87        | 1.76 | 0.017 * |

30 **Supplementary Table S6:** PERMANOVA based on Bray-Curtis dissimilarity index and  
 31 dishwasher conditions using 999 permutations. The analyses were executed using the vegan  
 32 package for R software. df: degrees of freedom;  $R^2$ : coefficient of determination; p: p-values.  
 33 Star indicates the level of significance of each factor: ‘\*’ p < 0.05.

| Source                | Factors          | df | $R^2$ | p      |
|-----------------------|------------------|----|-------|--------|
| Bacteria<br>Diversity | Years of use     | 2  | 0.11  | 0.186  |
|                       | Temperature      | 1  | 0.05  | 0.386  |
|                       | Water hardness   | 3  | 0.13  | 0.519  |
|                       | Frequency of use | 2  | 0.14  | 0.045* |
|                       | Residuals        | 12 | 0.56  |        |
| Fungi<br>Diversity    | Years of use     | 2  | 0.10  | 0.200  |
|                       | Temperature      | 1  | 0.06  | 0.135  |
|                       | Water Hardness   | 3  | 0.17  | 0.018* |
|                       | Frequency of use | 1  | 0.09  | 0.127  |
|                       | Residuals        | 13 | 0.58  |        |
